# Supplementary material for: Consensus Micro RNAs Governing the Switch of Dormant Tumors to the Fast-Growing Angiogenic Phenotype
Source: PubMed Central journal article supplement (PMC3432069; doi:10.1371/journal.pone.0044001), 2012-08-31

Supplemental Figure 1

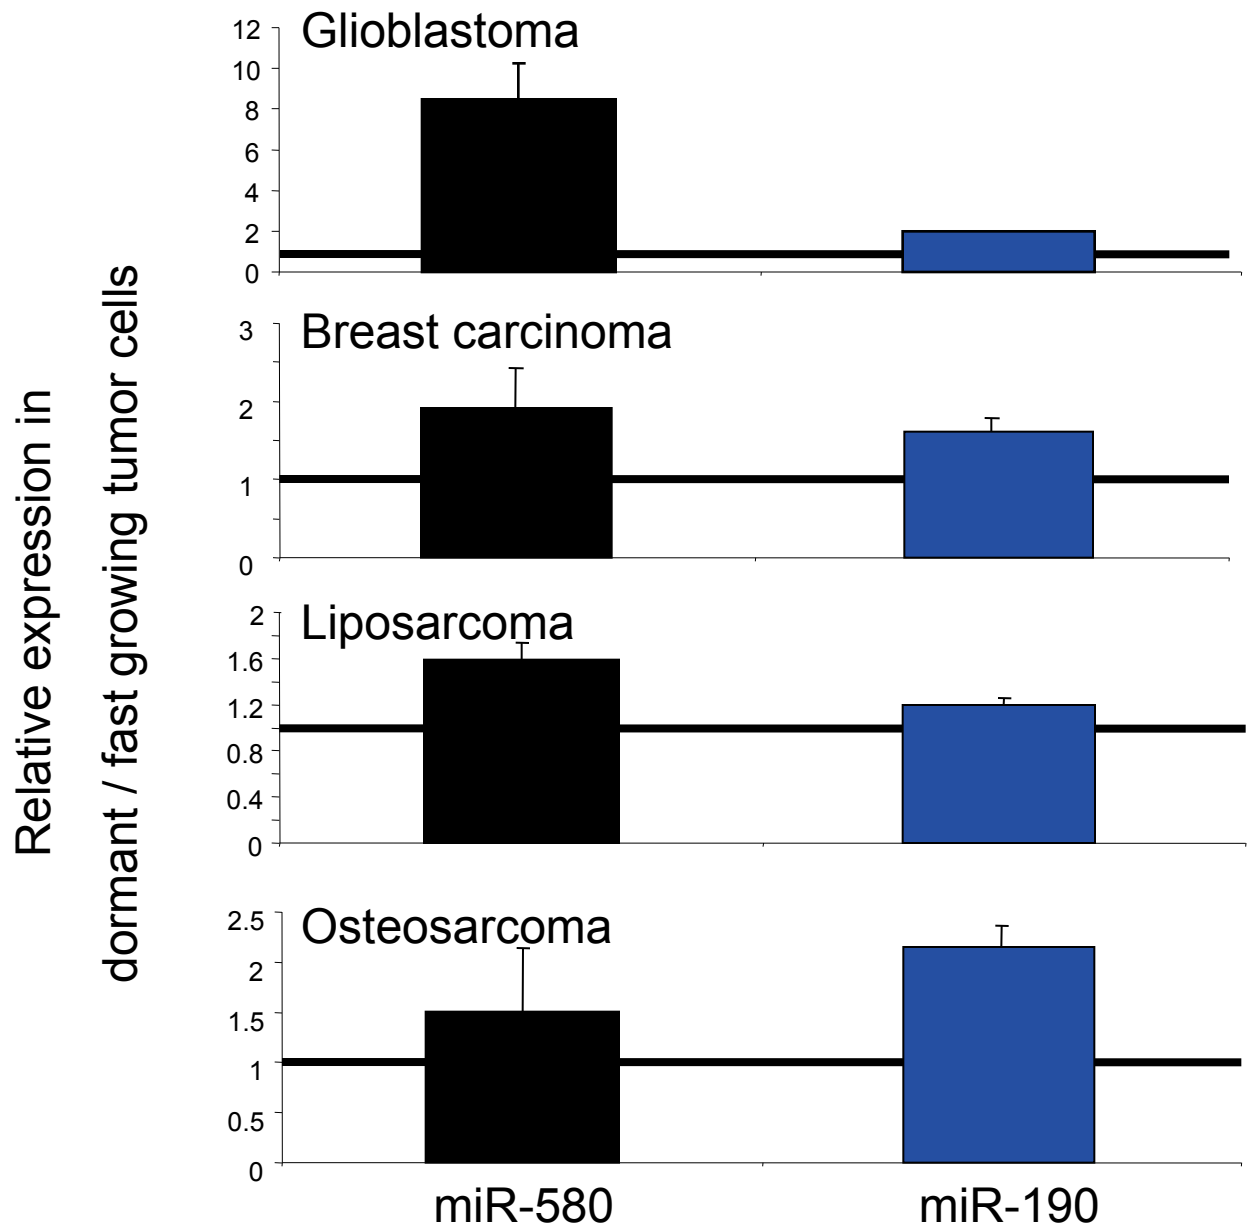

**Supplemental  
Figure 2**

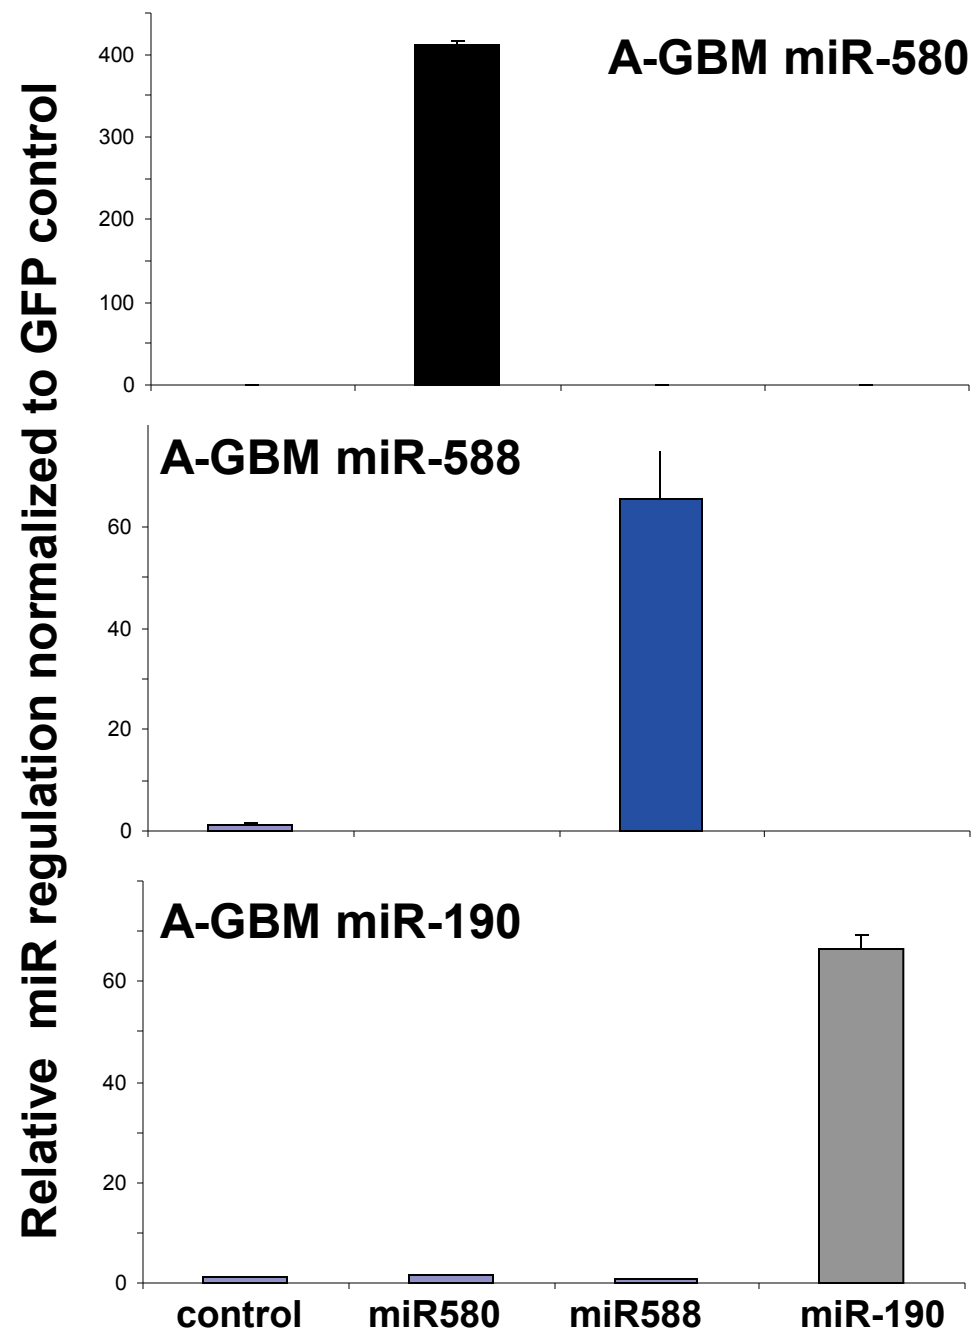

# Supplemental Figure 3

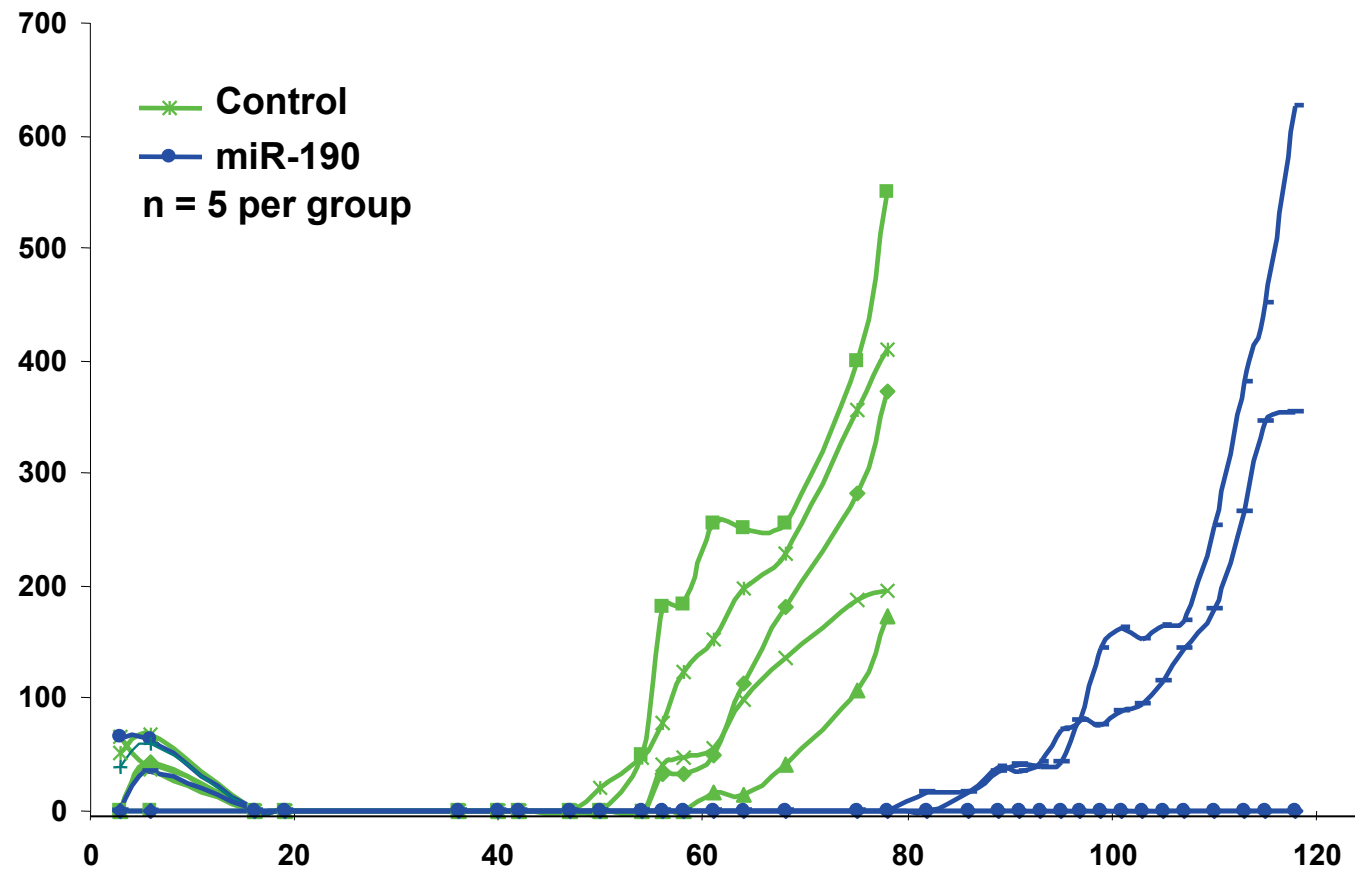

Supplement: pone.0044001.s001.pdf [file pone.0044001.s001.pdf]
